# Supplementary material for: Monocarboxylate transporters in cancer
Source: PubMed Central journal article supplement — Mol Metab. 2019 Jul 27;33:48–66. doi: 10.1016/j.molmet.2019.07.006 (PMC7056923; doi:10.1016/j.molmet.2019.07.006), 2019-07-27
Supplement: mmc1.pdf [file mmc1.pdf]

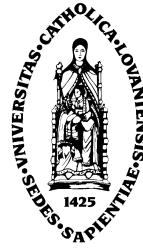

---

Brussels, April 30<sup>th</sup>, 2019

### Declaration of interest

We wish to draw the attention of the Editor to the following facts which may be considered as potential conflicts of interest and to significant financial contributions to this work: corresponding author Pierre Sonveaux is inventor of PCT international application number PCT/EP2017/072582 “[18F]-labelled lactate as a PET radiotracer”. We confirm that there are no known other conflicts of interest associated with this publication and that there has been no significant financial support for this work that could have influenced its outcome.

We confirm that the manuscript has been read and approved by all named authors and that there are no other persons who satisfied the criteria for authorship but are not listed. We further confirm that the order of authors listed in the manuscript has been approved by all of us.

We confirm that we have given due consideration to the protection of intellectual property associated with this work and that there are no impediments to publication, including the timing of publication, with respect to intellectual property. In so doing, I confirm that we have followed the regulations of our institutions concerning intellectual property.

We understand that the Corresponding Author is the sole contact for the Editorial process (including Editorial Manager and direct communications with the office). He is responsible for communicating with the other authors about progress, submissions of revisions and final approval of proofs.

We confirm that we have provided a current, correct email address which is accessible by the Corresponding Author and which has been configured to accept email from [pierre.sonveaux@uclouvain.be](mailto:pierre.sonveaux@uclouvain.be)

Signed by the Corresponding Author in his the name and in the name of co-authors.

Sincerely yours,

Prof. Pierre Sonveaux
